# Supplementary material
Source: publisher figshare collection journal article supplement (https://acs.figshare.com/ndownloader/files/7544233)
Supplement: Supplementary file 1 [file 7544233]

## Sheet: ECN All Species
Table S4. Expanded canonical network species (Related to Figure 4D). This file contains all species in the ECN. Species are listed by gene symbol.
ECN All Species (Gene Symbol)
ABCC1
ABCC8
ABHD5
ABL1
ABL2
ABLIM1
ABLIM2
ABLIM3
ACACA
ACACB
ACE
ACKR3
ACOX1
ACOX3
ACP1
ACSBG1
ACSBG2
ACSL1
ACSL3
ACSL4
ACSL5
ACSL6
ACTB
ACTC1
ACTG1
ACTN1
ACTN2
ACTN3
ACTN4
ACVR1
ACVR1B
ACVR1C
ACVR2A
ACVR2B
ADAM10
ADAM17
ADCY1
ADCY10
ADCY2
ADCY3
ADCY4
ADCY5
ADCY6
ADCY7
ADCY8
ADCY9
ADCYAP1R1
ADIPOQ
ADIPOR1
ADIPOR2
ADORA1
ADORA2A
ADORA2B
ADORA3
ADRA1A
ADRA1B
ADRA1D
ADRA2A
ADRA2B
ADRA2C
ADRB1
ADRB2
ADRB3
ADRBK1
ADRBK2
AFP
AGAP2
AGRP
AGTR1
AGTR2
AJUBA
AKT1
AKT1S1
AKT2
AKT3
ALK
ALS2
AMH
AMOT
ANAPC1
ANAPC10
ANAPC11
ANAPC13
ANAPC2
ANAPC4
ANAPC5
ANAPC7
ANGPT1
ANGPT2
ANGPT4
ANK1
ANK2
ANK3
APAF1
APBB1IP
APC
APC2
APITD1
AR
ARAF
ARAP3
AREG
ARF1
ARF6
ARHGAP10
ARHGAP35
ARHGAP5
ARHGDIA
ARHGDIB
ARHGDIG
ARHGEF1
ARHGEF12
ARHGEF26
ARHGEF4
ARHGEF6
ARHGEF7
ARNT
ARNT2
ARPC1A
ARPC1B
ARPC2
ARPC3
ARPC4
ARPC5
ARPC5L
ARRB1
ARRB2
ASAP1
ASAP2
ASAP3
ASIC1
ASIC2
ASIC3
ASIC4
ASIC5
ATF1
ATF2
ATF3
ATF4
ATF6
ATF6B
ATG12
ATM
ATP1A1
ATP1A2
ATP1A3
ATP1A4
ATP1B1
ATP1B2
ATP1B3
ATP1B4
ATP2A1
ATP2A2
ATP2A3
ATP2B1
ATP2B2
ATP2B3
ATP2B4
ATP6AP1
ATP6V0A1
ATP6V0A2
ATP6V0A4
ATP6V0B
ATP6V0C
ATP6V0D1
ATP6V0D2
ATP6V1H
ATR
AVP
AVPR1A
AVPR1B
AVPR2
AXIN1
AXIN2
BAD
BAG4
BAI1
BAIAP2
BAK1
BAMBI
BAX
BBC3
BCAR1
BCL10
BCL2
BCL2L1
BCL2L11
BCL2L2
BCL6
BCR
BDKRB1
BDKRB2
BDNF
BID
BIRC2
BIRC3
BIRC5
BIRC7
BIRC8
BLNK
BMF
BMI1
BMP2
BMP4
BMP5
BMP6
BMP7
BMP8A
BMP8B
BMPR1A
BMPR1B
BMPR2
BNIP3
BRAF
BRAP
BRCA1
BTC
BTK
BTRC
BUB1
BUB3
C1QA
C1QB
C1QBP
C1QC
C3
CACNA1A
CACNA1B
CACNA1C
CACNA1D
CACNA1E
CACNA1F
CACNA1G
CACNA1H
CACNA1I
CACNA1S
CACNA2D1
CACNA2D2
CACNA2D3
CACNA2D4
CACNB1
CACNB2
CACNB3
CACNB4
CACNG1
CACNG2
CACNG3
CACNG4
CACNG5
CACNG6
CACNG7
CACNG8
CALM1
CALML3
CALML5
CALML6
CALR
CALY
CAMK1
CAMK1D
CAMK1G
CAMK2A
CAMK2B
CAMK2D
CAMK2G
CAMK4
CAMKK1
CAMKK2
CANX
CAPN1
CAPN2
CARD11
CARD18
CARD6
CARD8
CARD9
CASP1
CASP10
CASP12
CASP3
CASP5
CASP6
CASP7
CASP8
CASP9
CAT
CAV1
CAV2
CAV3
CBL
CBLB
CBLC
CCDC6
CCL1
CCL11
CCL13
CCL14
CCL15
CCL16
CCL17
CCL18
CCL19
CCL2
CCL20
CCL21
CCL22
CCL23
CCL24
CCL25
CCL26
CCL27
CCL28
CCL3
CCL3L1
CCL4
CCL4L1
CCL5
CCL7
CCL8
CCNA1
CCNA2
CCNB1
CCNB2
CCNB3
CCND1
CCND2
CCND3
CCNE1
CCNE2
CCNG1
CCNG2
CCR1
CCR10
CCR2
CCR3
CCR4
CCR5
CCR6
CCR7
CCR8
CCR9
CD14
CD19
CD209
CD22
CD244
CD247
CD28
CD36
CD38
CD3D
CD3E
CD3G
CD4
CD40
CD40LG
CD44
CD48
CD55
CD72
CD74
CD79A
CD79B
CD80
CD82
CD86
CD8A
CD8B
CDC16
CDC23
CDC25A
CDC25B
CDC25C
CDC26
CDC27
CDC42
CDCA5
CDH1
CDH5
CDIPT
CDK1
CDK2
CDK4
CDK5
CDK5R1
CDK6
CDKN1A
CDKN1B
CDKN2A
CDKN2B
CDKN2D
CDS1
CDS2
CEBPA
CEBPB
CEBPG
CER1
CFL1
CFL2
CFLAR
CFTR
CGA
CHD8
CHEK1
CHEK2
CHKA
CHKB
CHRM1
CHRM2
CHRM3
CHRM4
CHRM5
CHRNA3
CHRNA4
CHRNA6
CHRNA7
CHRNB2
CHRNB4
CHUK
CIITA
CISH
CKS1B
CKS2
CLEC4M
CNGA1
CNGA2
CNGA3
CNGA4
CNGB1
CNGB3
CNR1
CNTF
CNTFR
COL11A1
COL11A2
COL1A1
COL1A2
COL21A1
COL24A1
COL27A1
COL2A1
COL3A1
COL5A1
COL5A2
COL5A3
cpdC20792
cpdC20793
CPT1A
CPT1B
CPT1C
CR1
CR2
CREB1
CREB3
CREB3L1
CREB3L2
CREB3L3
CREB3L4
CREB5
CREBBP
CREM
CRK
CRKL
CRLF2
CRTC1
CRTC2
CRTC3
CSF1
CSF1R
CSF2
CSF2RA
CSF2RB
CSF3
CSF3R
CSH2
CSK
CSN2
CSNK1A1
CSNK1A1L
CSNK1D
CSNK1E
CSNK2A1
CSNK2A2
CSNK2B
CTBP1
CTBP2
CTF1
CTLA4
CTNNA1
CTNNA2
CTNNA3
CTNNB1
CTNNBIP1
CTNND1
CTSD
CTSS
CTTN
CX3CL1
CX3CR1
CXCL1
CXCL10
CXCL11
CXCL12
CXCL13
CXCL14
CXCL16
CXCL2
CXCL3
CXCL5
CXCL6
CXCL8
CXCL9
CXCR1
CXCR2
CXCR3
CXCR4
CXCR5
CXCR6
CXXC4
CYBA
CYBB
CYCS
CYLD
CYP17A1
CYTH1
CYTH2
CYTH3
CYTH4
DAAM1
DAAM2
DAG1
DAPK1
DAPK2
DAPK3
DAPP1
DAXX
DCC
DCN
DDB2
DDIT3
DDIT4
DDX3X
DDX58
DERL1
DFFA
DFFB
DGKA
DGKB
DGKD
DGKE
DGKG
DGKH
DGKI
DGKK
DGKQ
DGKZ
DHX58
DIAPH1
DIAPH2
DIAPH3
DICER1
DKK1
DKK2
DKK4
DLG1
DMD
DNAJC3
DNM1
DNM1L
DNM2
DNM3
DNMT3A
DNMT3B
DOCK1
DOCK2
DOCK4
DOK1
DPYSL2
dr
DRD1
DRD2
DRD3
DRD4
DRD5
DUSP1
DUSP10
DUSP16
DUSP2
DUSP3
DUSP4
DUSP5
DUSP6
DUSP7
DUSP8
DUSP9
DVL1
DVL2
DVL3
DYNC1H1
DYNC1I1
DYNC1I2
DYNC1LI1
DYNC1LI2
DYNC2H1
E2F1
E2F2
E2F3
ECSIT
EDNRA
EDNRB
EEA1
EEF1A1
EEF1A2
EEF2
EEF2K
EFNA1
EFNA2
EFNA3
EFNA4
EFNA5
EFNB1
EFNB2
EFNB3
EGF
EGFR
EGLN1
EGLN2
EGLN3
EGR1
EGR2
EGR3
EI24
EIF2AK1
EIF2AK2
EIF2AK3
EIF2AK4
EIF2S1
EIF4B
EIF4E
EIF4E1B
EIF4E2
EIF4EBP1
ELAVL1
ELF5
ELK1
ELK4
ELMO1
ELMO2
ELMO3
EML4
ENAH
EP300
EPAS1
EPHA1
EPHA2
EPHA3
EPHA4
EPHA5
EPHA6
EPHA7
EPHA8
EPHB1
EPHB2
EPHB3
EPHB4
EPHB6
EPO
EPOR
ERBB2
ERBB2IP
ERBB3
ERBB4
EREG
ERN1
ESPL1
ESR1
ESR2
ESRRB
ETS1
ETS2
EXOC2
EXOC7
EZH2
EZR
F11R
F2R
F2RL1
F2RL3
FAAP24
FABP4
FADD
FANCM
FARP2
FAS
FASLG
FASN
FBP1
FBP2
FBXO25
FBXO32
FBXW11
FCER1A
FCER1G
FCER2
FCGR1A
FCGR2A
FCGR2B
FCGR2C
FCGR3A
FCGR3B
FDPS
FER
FERMT3
FES
FFAR2
FGA
FGB
FGD1
FGD3
FGF1
FGF10
FGF11
FGF12
FGF13
FGF14
FGF16
FGF17
FGF18
FGF19
FGF2
FGF20
FGF21
FGF22
FGF23
FGF3
FGF4
FGF5
FGF6
FGF7
FGF8
FGF9
FGFR1
FGFR2
FGFR3
FGFR4
FGG
FGR
FHL2
FIGF
FLNA
FLNB
FLNC
FLOT1
FLOT2
FLT1
FLT3
FLT3LG
FLT4
FN1
FOS
FOSB
FOSL1
FOSL2
FOXO1
FOXO3
FOXO4
FOXO6
FOXP1
FPR1
FRAT1
FRAT2
FRS2
FSHB
FSHR
FXYD1
FXYD2
FXYD4
FYN
FZD1
FZD10
FZD2
FZD3
FZD4
FZD5
FZD6
FZD7
FZD8
FZD9
FZR1
G6PC
G6PC2
G6PC3
GAB1
GAB2
GABARAP
GABARAPL1
GABARAPL2
GABBR1
GABBR2
GADD45A
GADD45B
GADD45G
GALT
GATA4
GCK
GDF5
GDF6
GDF7
GH1
GH2
GHR
GHRL
GHSR
GIPR
GIT1
gl
GLI1
GLI2
GLI3
GLP1R
GLS
GLS2
GNA11
GNA12
GNA13
GNA14
GNA15
GNAI1
GNAI2
GNAI3
GNAL
GNAO1
GNAQ
GNAS
GNAT3
GNB1
GNB2
GNB2L1
GNB3
GNB4
GNB5
GNG10
GNG11
GNG12
GNG13
GNG2
GNG3
GNG4
GNG5
GNG7
GNG8
GNGT1
GNGT2
GNRH1
GNRH2
GNRHR
GP6
GPC1
GPC3
GPER1
GPR119
GPX1
GRAP2
GRB2
GRIA1
GRIA2
GRIA3
GRIA4
GRIN1
GRIN2A
GRIN2B
GRIN2C
GRIN2D
GRIN3A
GRIN3B
GRK1
GRK4
GRK5
GRK6
GRK7
GRM1
GRM2
GRM3
GRM4
GRM5
GRM6
GRM7
GRM8
GSK3A
GSK3B
GSN
GTF2I
GTF2IRD1
GTSE1
GUCY1A2
GUCY1A3
GUCY1B3
GYS1
GYS2
GZMB
HBEGF
HCAR1
HCAR2
HCAR3
HCFC1
HCFC2
HCK
HCLS1
HCN2
HCN4
HCST
HDAC1
HDAC2
HDAC4
HGF
HHIP
HIF1A
HIP1
HK1
HK2
HK3
HKDC1
HLA-A
HLA-B
HLA-C
HLA-DMA
HLA-DMB
HLA-DOA
HLA-DOB
HLA-DPA1
HLA-DPB1
HLA-DQA1
HLA-DQA2
HLA-DQB1
HLA-DRA
HLA-DRB1
HLA-DRB3
HLA-DRB4
HLA-DRB5
HLA-E
HLA-F
HLA-G
HMDB00011
HMDB00044
HMDB00045
HMDB00050
HMDB00053
HMDB00058
HMDB00068
HMDB00073
HMDB00108
HMDB00112
HMDB00122
HMDB00134
HMDB00148
HMDB00151
HMDB00190
HMDB00208
HMDB00211
HMDB00213
HMDB00216
HMDB00234
HMDB00248
HMDB00254
HMDB00259
HMDB00265
HMDB00464
HMDB00538
HMDB00588
HMDB00595
HMDB00692
HMDB00895
HMDB00902
HMDB00968
HMDB01035
HMDB01043
HMDB01047
HMDB01085
HMDB01143
HMDB01175
HMDB01187
HMDB01201
HMDB01220
HMDB01273
HMDB01313
HMDB01314
HMDB01341
HMDB01377
HMDB01381
HMDB01397
HMDB01452
HMDB01498
HMDB01517
HMDB01547
HMDB01830
HMDB02111
HMDB02168
HMDB02179
HMDB02190
HMDB02227
HMDB02232
HMDB02802
HMDB02961
HMDB03125
HMDB03235
HMDB03352
HMDB03378
HMDB03441
HMDB03529
HMDB03876
HMDB04080
HMDB04243
HMDB04244
HMDB04246
HMDB04472
HMDB04527
HMDB04666
HMDB05843
HMDB06229
HMDB06234
HMDB06235
HMDB11134
HMDB14642
HMDB15197
HMDB33963
HMDB59597
HMDB60263
HMGA2
HMGCR
HMOX1
HNF4A
HNRNPK
HOMER1
HOMER2
HOMER3
HOXD10
HPSE
HPSE2
HRAS
HRH1
hsa
HSF1
HSP90AA1
HSP90AB1
HSP90B1
HSPA1B
HSPA1L
HSPA2
HSPA5
HSPA6
HSPA8
HSPA9
HSPB1
HSPB2
HSPD1
HSPG2
HTR1A
HTR1B
HTR1D
HTR1E
HTR1F
HTR2A
HTR2B
HTR2C
HTR3A
HTR3B
HTR3C
HTR3D
HTR3E
HTR4
HTR5A
HTR6
HTR7
HTRA2
HTT
ICAM1
ICOS
ID1
ID2
ID3
ID4
IDO1
IDO2
IFIH1
IFNA1
IFNA10
IFNA14
IFNA16
IFNA17
IFNA2
IFNA21
IFNA4
IFNA5
IFNA6
IFNA7
IFNA8
IFNAR1
IFNAR2
IFNB1
IFNE
IFNG
IFNGR1
IFNGR2
IFNK
IFNL1
IFNL2
IFNL3
IFNLR1
IFNW1
IGF1
IGF1R
IGF2
IGF2BP1
IGFBP3
IGSF5
IKBKB
IKBKE
IKBKG
IL10
IL10RA
IL10RB
IL11
IL11RA
IL12A
IL12B
IL12RB1
IL12RB2
IL13
IL13RA1
IL13RA2
IL15
IL15RA
IL17D
IL18
IL19
IL1A
IL1B
IL1R1
IL1R2
IL1RAP
IL2
IL20
IL20RA
IL20RB
IL21
IL21R
IL22
IL22RA1
IL22RA2
IL23A
IL23R
IL24
IL27RA
IL2RA
IL2RB
IL2RG
IL3
IL33
IL3RA
IL4
IL4R
IL5
IL5RA
IL6
IL6R
IL6ST
IL7
IL7R
IL9
IL9R
ILK
IMPA1
IMPA2
IMPAD1
INADL
INHBA
INHBB
INHBC
INHBE
INPP1
INPP4A
INPP4B
INPP5A
INPP5B
INPP5D
INPP5E
INPP5J
INPP5K
INPPL1
INS
INSR
INSRR
INVS
IP6K1
IP6K2
IP6K3
IPMK
IPPK
IQGAP1
IQGAP2
IQGAP3
IRAK1
IRAK2
IRAK3
IRAK4
IRF1
IRF3
IRF5
IRF7
IRF8
IRF9
IRS1
IRS2
IRS4
ISG15
ITCH
ITGA1
ITGA10
ITGA11
ITGA2
ITGA2B
ITGA3
ITGA4
ITGA5
ITGA6
ITGA7
ITGA8
ITGA9
ITGAD
ITGAE
ITGAL
ITGAM
ITGAV
ITGAX
ITGB1
ITGB2
ITGB3
ITGB4
ITGB5
ITGB6
ITGB7
ITGB8
ITK
ITPK1
ITPKA
ITPKB
ITPKC
ITPR1
ITPR2
ITPR3
JAK1
JAK2
JAK3
JAM2
JAM3
JUN
JUNB
JUND
JUP
KCNE1
KCNJ1
KCNJ11
KCNJ12
KCNJ14
KCNJ2
KCNJ3
KCNJ4
KCNJ5
KCNJ6
KCNJ8
KCNJ9
KCNMA1
KCNMB1
KCNMB2
KCNMB3
KCNMB4
KCNQ1
KCNU1
KDR
KIDINS220
KIF23
KIR2DL1
KIR2DL2
KIR2DL3
KIR2DL4
KIR2DL5A
KIR2DS1
KIR2DS2
KIR2DS3
KIR2DS4
KIR2DS5
KIR3DL1
KIR3DL2
KIT
KITLG
KLF2
KLF4
KLK3
KLRC1
KLRD1
KLRK1
KRAS
KRIT1
KSR1
KSR2
LAMA1
LAMA2
LAMA3
LAMA4
LAMA5
LAMB1
LAMB2
LAMB3
LAMB4
LAMC1
LAMC2
LAMC3
LAMP1
LAMP2
LAMTOR3
LAT
LATS1
LATS2
LCK
LCP2
LEF1
LEP
LEPR
LHB
LHCGR
LIF
LIFR
LILRB3
LIMD1
LIMK1
LIMK2
LIPE
LMO7
LPAR1
LPAR2
LPAR3
LPAR4
LPAR5
LPAR6
LRP5
LRP6
LTA
LTB
LTBR
LUM
LY96
LYL1
LYN
MAD1L1
MAD2L1
MAD2L2
MAFA
MAGED1
MAGI1
MAGI2
MAGI3
MAP2K1
MAP2K2
MAP2K3
MAP2K4
MAP2K5
MAP2K6
MAP2K7
MAP3K1
MAP3K11
MAP3K12
MAP3K13
MAP3K14
MAP3K2
MAP3K3
MAP3K4
MAP3K5
MAP3K6
MAP3K7
MAP3K8
MAP4K1
MAP4K2
MAP4K3
MAP4K4
MAPK1
MAPK10
MAPK11
MAPK12
MAPK13
MAPK14
MAPK3
MAPK7
MAPK8
MAPK8IP1
MAPK8IP2
MAPK8IP3
MAPK9
MAPKAPK2
MAPKAPK3
MAPKAPK5
MAPT
MARCKS
MARCKSL1
MATK
MAVS
MAX
MC2R
MCL1
MDM2
MDM4
MECOM
MEF2A
MEF2B
MEF2C
MEF2D
MEFV
MET
MGEA5
MICA
MICB
MIR1-1
MIR1-2
MIR100
MIR101-1
MIR101-2
MIR103A1
MIR103A2
MIR103B1
MIR103B2
MIR106B
MIR107
MIR10A
MIR10B
MIR122
MIR124-1
MIR124-2
MIR124-3
MIR125A
MIR125B1
MIR125B2
MIR126
MIR128-1
MIR128-2
MIR129-1
MIR129-2
MIR133A1
MIR133A2
MIR133B
MIR135A1
MIR135A2
MIR135B
MIR137
MIR141
MIR143
MIR145
MIR146A
MIR155
MIR15A
MIR15B
MIR16-1
MIR16-2
MIR17
MIR181A1
MIR181A2
MIR181B1
MIR181B2
MIR181C
MIR181D
MIR183
MIR18A
MIR193B
MIR195
MIR199A1
MIR199A2
MIR19A
MIR19B1
MIR19B2
MIR200A
MIR200B
MIR200C
MIR205
MIR20A
MIR21
MIR210
MIR214
MIR221
MIR222
MIR223
MIR224
MIR23A
MIR26A1
MIR26A2
MIR29A
MIR29B1
MIR29B2
MIR29C
MIR30A
MIR30B
MIR30C1
MIR30C2
MIR30D
MIR30E
MIR31
MIR32
MIR326
MIR330
MIR331
MIR345
MIR34A
MIR34B
MIR373
MIR449A
MIR520A
MIR520C
MIR520G
MIR520H
MIR602
MIR7-1
MIR7-2
MIR7-3
MIR9-1
MIR9-2
MIR9-3
MIR92A1
MIR92A2
MIR99A
MIRLET7A1
MIRLET7A2
MIRLET7A3
MIRLET7B
MIRLET7C
MIRLET7D
MIRLET7E
MIRLET7F1
MIRLET7F2
MIRLET7G
MIRLET7I
MKNK1
MKNK2
MLKL
MLLT4
MLX
MLXIP
MLXIPL
MLYCD
MMP1
MMP14
MMP16
MMP2
MMP7
MMP9
MOB1A
MOB1B
MOS
MPL
MPP5
MRAS
MRC1
MRC2
MRVI1
MS4A2
MSN
MTCP1
MTM1
MTMR1
MTMR14
MTMR2
MTMR3
MTMR4
MTMR6
MTMR7
MTMR8
MTOR
MYB
MYC
MYD88
MYH10
MYH14
MYH6
MYH7
MYH9
MYL10
MYL12A
MYL12B
MYL2
MYL3
MYL4
MYL5
MYL6
MYL6B
MYL7
MYL9
MYLK
MYLK2
MYLK3
MYLK4
MYLPF
MYO10
NAIP
NANOG
NCAM1
NCAM2
NCF1
NCF2
NCF4
NCK1
NCK2
NCOA4
NCR1
NCR2
NCR3
NEDD4
NEDD4L
NEFH
NEFL
NEFM
NF1
NFATC1
NFATC2
NFATC3
NFATC4
NFE2L2
NFKB1
NFKB2
NFKBIA
NFKBIB
NFKBIE
NFKBIZ
NFYA
NFYB
NFYC
NGEF
NGF
NGFR
NGFRAP1
NKD1
NKD2
NKX3-1
NLK
NLRC4
NLRP1
NLRP3
NLRX1
NOD1
NOD2
NODAL
NOS1
NOS2
NOS3
NOTCH1
NOTCH2
NOTCH3
NOTCH4
NOX1
NOX3
NPPB
NPR1
NPR2
NPY
NPY1R
NR1H2
NR1H3
NR3C2
NR4A1
NRAS
NRG1
NRG2
NRG3
NRG4
NSMAF
NTF3
NTF4
NTRK1
NTRK2
NTRK3
NUDT16L1
OCRL
OGT
OPRD1
OPRM1
ORAI1
OSM
OSMR
OTUD5
OXT
OXTR
P2RX1
P2RY1
P2RY12
P2RY2
PAK1
PAK2
PAK3
PAK4
PAK6
PAK7
PARD3
PARD6A
PARD6B
PARD6G
PARVA
PARVB
PARVG
PAX8
PCK1
PCK2
PCNA
PCYT1A
PCYT1B
PDCD1
PDCD4
PDE2A
PDE3A
PDE3B
PDE4A
PDE4B
PDE4C
PDE4D
PDGFA
PDGFB
PDGFC
PDGFD
PDGFRA
PDGFRB
PDPK1
PDX1
PECAM1
PER2
PERP
PF4
PF4V1
PFKFB1
PFKFB2
PFKFB3
PFKFB4
PFKL
PFKM
PFKP
PFN1
PFN2
PFN3
PFN4
PGAM5
PGF
PGR
PHKA1
PHKA2
PHKB
PHKG1
PHKG2
PHLPP1
PHLPP2
PI4K2A
PI4K2B
PI4KA
PI4KB
PIAS1
PIAS2
PIDD1
PIK3AP1
PIK3C2A
PIK3C2B
PIK3C2G
PIK3C3
PIK3CA
PIK3CB
PIK3CD
PIK3CG
PIK3R1
PIK3R2
PIK3R3
PIK3R5
PIKFYVE
PILRA
PIM1
PIM2
PIN1
PIP4K2A
PIP4K2B
PIP4K2C
PIP5K1A
PIP5K1B
PIP5K1C
PKLR
PKM
PKMYT1
PKN1
PKN2
PKN3
PLA1A
PLA2G10
PLA2G12A
PLA2G12B
PLA2G16
PLA2G1B
PLA2G2A
PLA2G2C
PLA2G2D
PLA2G2E
PLA2G2F
PLA2G3
PLA2G4A
PLA2G4B
PLA2G4C
PLA2G4D
PLA2G4E
PLA2G4F
PLA2G5
PLA2G6
PLA2R1
PLAU
PLAUR
PLCB1
PLCB2
PLCB3
PLCB4
PLCD1
PLCD3
PLCD4
PLCE1
PLCG1
PLCG2
PLCZ1
PLD1
PLD2
PLEKHO2
PLIN1
PLK1
PLK2
PLK3
PLK4
PLN
PLXNA1
PLXNA2
PLXNA3
PLXNB1
PLXNB2
PLXNB3
PLXNC1
PMAIP1
PML
PNPLA2
POLD1
POLD2
POLD3
POLD4
POLE
POLE2
POLE3
POLE4
POMC
PORCN
POU5F1
POU5F1B
PPAP2A
PPAP2B
PPAP2C
PPARA
PPARD
PPARG
PPARGC1A
PPARGC1B
PPBP
PPIF
PPIP5K1
PPIP5K2
PPM1A
PPM1B
PPM1D
PPP1CA
PPP1CB
PPP1CC
PPP1R12A
PPP1R12B
PPP1R12C
PPP1R15A
PPP1R1A
PPP1R1B
PPP1R3A
PPP1R3B
PPP1R3C
PPP1R3D
PPP1R3E
PPP1R3F
PPP2CA
PPP2CB
PPP2R1A
PPP2R1B
PPP2R2A
PPP2R2B
PPP2R2C
PPP2R2D
PPP2R3A
PPP2R3B
PPP2R3C
PPP2R4
PPP2R5A
PPP2R5B
PPP2R5C
PPP2R5D
PPP2R5E
PPP3CA
PPP3CB
PPP3CC
PPP3R1
PPP3R2
PPP5C
PPP5D1
PRDM4
PREX1
PRICKLE1
PRICKLE2
PRKAA1
PRKAA2
PRKAB1
PRKAB2
PRKACA
PRKACB
PRKACG
PRKAG1
PRKAG2
PRKAG3
PRKAR1A
PRKAR1B
PRKAR2A
PRKAR2B
PRKCA
PRKCB
PRKCD
PRKCE
PRKCG
PRKCH
PRKCI
PRKCQ
PRKCZ
PRKD1
PRKD2
PRKD3
PRKDC
PRKG1
PRKG2
PRL
PRLR
PRMT1
PRNP
PRPH
PSEN1
PSEN2
PSMC1
PSTPIP1
PTCH1
PTCH2
PTEN
PTGER2
PTGER3
PTGER4
PTGFR
PTGIR
PTGS1
PTGS2
PTK2
PTK2B
PTMA
PTPN1
PTPN11
PTPN2
PTPN5
PTPN6
PTPN7
PTPRB
PTPRC
PTPRF
PTPRJ
PTPRM
PTPRR
PTPRZ1
PTTG1
PTTG2
PUBCHEM11347
PUBCHEM11371
PUBCHEM124489666
PUBCHEM124489667
PUBCHEM124489985
PUBCHEM13356
PUBCHEM13721
PUBCHEM13723
PUBCHEM13724
PUBCHEM14234
PUBCHEM14416
PUBCHEM163311914
PUBCHEM172232410
PUBCHEM17396178
PUBCHEM17396192
PUBCHEM3370
PUBCHEM3395
PUBCHEM3462
PUBCHEM3465
PUBCHEM3487
[truncated: 559 more rows]
